# Supplementary material for: Bioaccessibility of condensed tannins and their effect on the physico-chemical characteristics of lamb meat
Source: PeerJ. 2024 Jun 28;12:e17572. doi: 10.7717/peerj.17572 (PMC11216205; doi:10.7717/peerj.17572)
Supplement: Supplemental Information 1 [file peerj-12-17572-s001.xlsx]

## Sheet: Cooking weight loss 
					Cooking weight loss (%)
						R= repetition			T=treatment			D= day on shelf life
T1-D1	R1	R2	R3	Mean		T1-D4	R1	R2	R3	Mean		T1-D7	R1	R2	R3	Mean		T1-D14	R1	R2	R3	Mean
R1	13.8486	10.1135	3.7351	26.971		R1	8.8769	6.2454	2.6315	29.6444		R1	25.6672	18.066	7.6012	29.6144		R1	22.0857	16.9	5.1857	23.4799
R2	11.4813	7.7109	3.7704	32.8395		R2	9.2067	6.5207	2.686	29.1744		R2	19.7626	12.926	6.8366	34.5936		R2	18.8813	13.2743	5.607	29.696
R3	9.8644	6.5797	3.2847	33.2985		R3	12.1225	8.5252	3.5973	29.6746		R3	21.6092	14.5391	7.0701	32.718		R3	22.5862	14.5084	8.0778	35.7643
R4	11.6014	7.9552	3.6462	31.429		R4	12.778	8.4812	4.2968	33.6265		R4	26.3734	17.8932	8.4802	32.1544		R4	31.4523	22.9548	8.4975	27.0171
R5	10.5362	7.7649	2.7713	26.3027		R5	10.1804	6.6921	3.4883	34.2649		R5	17.6515	11.7715	5.88	33.3116		R5	22.7872	14.9222	7.865	34.515
R7	11.7854	8.5097	3.2757	27.7946		R7	10.9118	7.8887	3.0231	27.7049		R7	22.6084	15.2124	7.396	32.7135		R7	27.2579	21.1308	6.1271	22.4783
R8	8.0104	5.4353	2.5751	32.147		R8	7.3012	4.7558	2.5454	34.8628		R8	22.0878	14.6685	7.4193	33.59		R8	15.3817	10.6307	4.751	30.8874
R9	6.0679	4.4677	1.6002	26.3716		R9	8.9237	6.005	2.9187	32.7073		R9	15.9224	10.3257	5.5967	35.1499		R9	14.2162	9.6675	4.5487	31.9966
R10	13.689	9.1668	4.5222	33.0353		R10	14.1797	9.5364	4.6433	32.7461		R10	35.8063	23.4558	12.3505	34.4925		R10	33.8523	22.4343	11.418	33.7289
				30.021						31.6006						33.1487						29.9515
T2-D1						T2-D4						T2-D7						T2-D14
R1	11.1928	7.741	3.4518	30.8395		R1	14.2929	9.9354	4.3575	30.4872		R1	26.1722	18.0309	8.1413	31.1067		R1	28.0887	21.4872	6.6015	23.5023
R2	12.3121	8.069	4.2431	34.4628		R2	14.4923	8.6378	5.8545	40.3973		R2	14.9093	9.1886	5.7207	38.37		R2	17.0477	12.1904	4.8573	28.4924
R3	9.1794	6.4378	2.7416	29.8669		R3	15.2151	10.3111	4.904	32.2311		R3	18.6385	12.39	6.2485	33.5247		R3	25.6504	19.0801	6.5703	25.6148
R4	15.1356	11.3646	3.771	24.9148		R4	15.8832	10.5471	5.3361	33.5959		R4	20.9671	13.5505	7.4166	35.3726		R4	26.9557	19.7455	7.2102	26.7483
R5	11.709	7.9292	3.7798	32.2812		R5	18.1686	11.761	6.4076	35.2674		R5	18.7574	11.9	6.8574	36.5584		R5	22.306	15.0972	7.2088	32.3178
R6	8.1763	5.5325	2.6438	32.3349		R6	8.9572	5.6272	3.33	37.1768		R6	21.2655	13.9887	7.2768	34.2188		R6	29.7283	20.4967	9.2316	31.0532
R7	12.1186	9.2766	2.842	23.4516		R7	16.1296	11.2948	4.8348	29.9747		R7	25.3371	15.8443	9.4928	37.466		R7	24.2301	16.8781	7.352	30.3424
R8	18.9027	13.4616	5.4411	28.7848		R8	13.0216	8.336	4.6856	35.9833		R8	25.1205	16.7309	8.3896	33.3974		R8	34.4952	23.5494	10.9458	31.7314
R9	18.035	12.768	5.267	29.2043		R9	16.6062	10.3918	6.2144	37.4222		R9	27.8287	18.4234	9.4053	33.7971		R9	25.0682	19.898	5.1702	20.6245
R10	9.8722	6.9554	2.9168	29.5456		R10	14.6321	9.4923	5.1398	35.1269		R10	15.2292	9.4262	5.803	38.1044		R10	18.7547	13.4337	5.321	28.3716
				29.5686						34.7663						35.1916						27.8799
T3-D1						T3-D4						T3-D7						T3-D14
R1	9.1743	6.8608	2.3135	25.2172		R1	11.8937	8.0097	3.884	32.6559		R1	17.7455	12.0977	5.6478	31.8267		R1	24.2005	16.7652	7.4353	30.7237
R2	8.1235	5.8878	2.2357	27.5214		R2	20.1022	14.0243	6.0779	30.235		R2	16.2374	10.836	5.4014	33.2652		R2	28.409	19.4147	8.9943	31.66
R3	8.3953	5.737	2.6583	31.6641		R3	16.5044	10.8836	5.6208	34.0564		R3	21.5206	13.3544	8.1662	37.946		R3	32.5794	22.1511	10.4283	32.0089
R4	6.8144	4.8172	1.9972	29.3085		R4	16.6425	10.053	6.5895	39.5944		R4	19.944	13.5447	6.3993	32.0863		R4	21.5517	15.0686	6.4831	30.0816
R5	8.6171	5.8514	2.7657	32.0955		R5	21.4643	14.7222	6.7421	31.4108		R5	22	14.2643	7.7357	35.1623		R5	19.9466	13.2066	6.74	33.7902
R6	10.1235	6.9657	3.1578	31.1928		R6	10.7611	7.3976	3.3635	31.2561		R6	20.2294	13.9335	6.2959	31.1225		R6	19.3018	12.805	6.4968	33.659
R7	8.6345	5.8315	2.803	32.4628		R7	14.3606	9.7738	4.5868	31.9402		R7	14.3033	9.4582	4.8451	33.874		R7	20.5053	13.6187	6.8866	33.5845
R8	10.5785	7.6708	2.9077	27.4869		R8	16.141	10.982	5.159	31.9621		R8	16.6825	11.1755	5.507	33.0106		R8	28.2103	18.6755	9.5348	33.799
R9	12.1753	9.0087	3.1666	26.0084		R9	15.3639	10.4416	4.9223	32.0381		R9	16.7379	11.4833	5.2546	31.3934		R9	23.7931	23.6533	0.1398	0.587565
R10	9.0264	5.9768	3.0496	33.7853		R10	11.616	7.867	3.749	32.2744		R10	21.0923	13.8497	7.2426	34.3376		R10	22.7914	15.3134	7.478	32.8106
				29.6743						32.7423						33.4025						29.2705
T4-D1						T4-D4						T4-D7						T4-D14
R1	9.3211	6.1765	3.1446	33.7364		R1	17.0934	11.1313	5.9621	34.8795		R1	33.8834	21.7571	12.1263	35.7883		R1	34.1275	24.6198	9.5077	27.8594
R2	16.4325	10.8526	5.5799	33.9565		R2	22.8125	15.2184	7.5941	33.2892		R2	14.5387	10.3866	4.1521	28.5589		R2	38.5171	27.8744	10.6427	27.6311
R3	7.3149	5.0321	2.2828	31.2075		R3	14.6832	9.7096	4.9736	33.8727		R3	19.9781	13.7236	6.2545	31.3068		R3	22.2116	15.39	6.8216	30.7119
R4	10.7336	6.837	3.8966	36.3028		R4	14.9859	9.2797	5.7062	38.0771		R4	16.2381	11.2826	4.9555	30.5177		R4	27.3993	18.1586	9.2407	33.726
R5	11.2405	7.7164	3.5241	31.3518		R5	15.5114	9.982	5.5294	35.6473		R5	17.5273	11.3938	6.1335	34.994		R5	23.7316	15.2102	8.5214	35.9074
R6	8.9534	6.3274	2.626	29.3296		R6	16.5999	10.8628	5.7371	34.5611		R6	17.6273	12.1161	5.5112	31.2651		R6	22.5523	16.4469	6.1054	27.0722
R7	9.1191	6.2353	2.8838	31.6237		R7	20.0349	12.4191	7.6158	38.0127		R7	13.4954	8.7956	4.6998	34.8252		R7	19.8926	13.6636	6.229	31.3132
R8	5.6419	3.6055	2.0364	36.0942		R8	14.9961	9.2117	5.7844	38.5727		R8	12.9277	8.1011	4.8266	37.3353		R8	20.896	13.7618	7.1342	34.1415
R9	7.1587	4.8453	2.3134	32.3159		R9	13.4693	8.4556	5.0137	37.2232		R9	18.1346	10.8489	7.2857	40.1757		R9	15.5627	10.0605	5.5022	35.355
R10	6.7962	4.1501	2.6461	38.935		R10	15.1464	9.2537	5.8927	38.905		R10	13.4486	8.2642	5.1844	38.5497		R10	17.7174	11.0353	6.6821	37.7149
				33.4854						36.304						34.3317						32.1433

## Sheet: Colour 
					Meat colour
		Day 1					Day 4					Day 7					Day 14
	Treatment	L*	a*	b*	C*	H*	L*	a*	b*	C*	H*	L*	a*	b*	C*	H*	L*	a*	B*	C*	H*
	1	37.89	16.46	3.79333	20.9607	12.9777	36.8633	17.5333	4.81333	23.3038	15.3509	36.5233	17.95	5.65	18.8182	17.4721	38.35	19.84	6.17333	20.7782	17.2838
	1	35.5433	17.5	3.86333	21.4762	12.4491	37.39	20.61	6.52	27.0729	17.5548	38.05	19.0433	6.99	20.2857	20.156	36.6733	16.96	6.19	18.0543	20.0509
	1	39.3267	19.0867	4.86333	23.8463	14.2949	41.22	21.3567	6.93333	27.9212	17.9858	43.31	20.4933	8.91	22.3465	23.4982	43.23	17.3967	7.84	19.0817	24.2592
	1	34.2133	16.5133	2.80333	19.1186	9.63478	35.6367	17.8533	4.47667	22.7352	14.0765	35.3833	16.79	4.35	17.3444	14.525	36.98	18.4767	4.67	19.0577	14.1845
	1	39.14	19.67	5.40667	24.9624	15.3693	40.14	20.3333	5.19667	24.8793	14.3364	40.5967	20.4833	7.07	21.6691	19.0426	42.2033	18.1433	6.74667	19.3571	20.3978
	1	37.6533	15.4167	7.79	30.9242	26.8073	38.6567	16.2967	4.25333	21.8986	14.6276	38.3567	17.37	5.40667	18.192	17.2895	38.9267	15.8467	5	16.6168	17.5117
	1	35.0167	17.94	4.97	23.6984	15.4846	40.65	18.3567	5.36333	24.5404	16.287	42.6733	20.77	8.08333	22.2875	21.2651	41.1033	19.3467	6.7	20.474	19.1016
	1	35.2867	16.7067	4.04333	21.5455	13.6051	34.37	19.45	5.77667	25.5328	16.5415	36.54	18.9367	5.96667	19.8544	17.4889	37.0367	15.5767	8.45333	17.7226	28.4883
	1	37.3133	17.5167	4.08	21.8803	13.1116	36.6833	19.0933	6.03667	25.9305	17.5452	40	19.4533	6.97333	20.6654	19.721	42.2	17.1633	6.87333	18.4884	21.8244
	2	41.61	19.0233	5.26333	19.738	15.4656	41.9967	21.12	7.41	28.6328	19.3335	42.7833	20.5033	7.1	21.6978	19.1002	43.52	18.49	8.34667	20.2866	24.2951
	2	41.6033	19.72	4.36667	20.1977	12.4857	43.8967	20.6733	5.31333	25.2021	14.4138	43.1233	19.9833	5.77667	20.8015	16.1232	44.42	17.6467	7.35667	19.1187	22.6306
	2	38.5133	16.1467	4.14	16.669	14.3808	37.1	17.92	4.68333	23.144	14.6465	37.6033	17.5267	5.48333	18.3644	17.3726	42.9133	17.2333	7.20667	18.6795	22.6938
	2	32.7533	16.14	3.55667	16.5272	12.4273	41.2733	18.28	5.92667	25.629	17.9635	37.55	18.7967	5.43	19.5653	16.113	39.0767	15.6133	7.17333	17.1823	24.6758
	2	39.13	20.31	6.81667	21.4234	18.5534	39.7133	20.1833	5.69	25.5977	15.744	42.3	18.26	7.55667	19.7619	22.4816	43.3333	13.5167	10.31	16.9999	37.335
	2	38.29	19.7567	4.73333	20.3158	13.4731	37.5	20.3067	4.92667	24.4609	13.6372	39.7033	19.12	7.6	20.5751	21.6773	38.74	16.35	6.39333	17.5555	21.357
	2	35.14	18.6067	4.20333	19.0755	12.7297	37.63	21.1033	5.21667	25.2615	13.885	40.5267	19.0367	6.64333	20.1626	19.2377	40.5033	17.0467	10.0133	19.7701	30.4303
	2	38.6133	15.4833	4.27333	16.0622	15.4293	37.7433	17.9	4.97333	23.6962	15.5274	37.8933	18.8267	6.14	19.8026	18.0629	37.1267	18.23	7.5	19.7125	22.3627
	2	36.64	16.22	3.58667	16.6118	12.469	39.1333	18.08	4.18333	22.2847	13.0278	39.26	17.0233	5.28333	17.8244	17.2422	40.8833	17.3467	6.78667	18.627	21.3673
	2	35.7133	17.7133	3.96667	18.152	12.6224	40.31	18.3433	5.63667	25.065	17.0815	37.1867	18.3833	6.33	19.4426	19.0003	38.3767	16.45	7.25333	17.9781	23.7942
	3	38.35	19.4967	4.95667	24.1576	14.2642	39.2167	19.58	5.54	20.3487	15.7984	42.1367	20.01	7.59	21.4011	20.7723	43.2433	12.1367	10.7467	16.2108	41.524
	3	39.1433	20.7267	5.60667	25.6653	15.1365	46.21	18.01	7.16	19.3811	21.6806	46.8067	17.5967	9.81	20.1464	29.1393	49.12	10.3033	12.1167	15.9051	49.624
	3	38.4167	19.2933	5.04	24.2192	14.6402	41.3067	20.0633	5.4	20.7773	15.0641	41.4333	20.34	7.23667	21.589	19.5848	41.7267	15.1367	9.46	17.8497	32.0042
	3	46.65	22.2367	5.17	25.8028	13.0887	45.88	16.0667	5.4	16.9499	18.5775	40.2567	17.2433	6.06	18.2772	19.3635	45.7333	8.10667	10.7433	13.4587	52.9627
	3	40.97	20.14	5.15	24.7257	14.3437	41.4933	19.31	5.91333	20.1951	17.0262	42.1567	19.71	7.09	20.9464	19.7845	47.6833	10.26	13.75	17.1561	53.2704
	3	43.0067	20.3	5.95	26.0568	16.336	45.1533	19.0067	6.73	20.163	19.4984	41.2867	17.93	7.11	19.2883	21.6304	46.4233	10.5467	11.5667	15.6531	47.641
	3	38.9133	20.3337	5.05667	24.6675	13.9653	43.9167	18.5433	6.05333	19.5064	18.0789	41.36	16.7467	8.16667	18.6318	25.9966	46.1633	9.53333	12.0667	15.3782	51.6893
	3	35.0367	19.1733	4.3	22.9652	12.6406	37.0433	20.08	5.27	20.76	14.7056	39.5867	19.4067	7.26667	20.7225	20.528	41.61	10.9333	11.9967	16.2314	47.6551
	3	35.33	17.5633	3.52	20.9023	11.3329	38.61	20.5233	6	21.3824	16.2963	40.03	18.09	6.46333	19.21	19.6612	40.4133	17.2333	7.2	18.6769	22.6749
	3	42.8733	19.94	5.19667	24.7179	14.6072	47.89	19.0233	6.78	20.1954	19.6163	47.8733	18.1167	7.54	19.6231	22.5967	50.9533	11.67	12.86	17.3657	47.7774
	4	44.1467	19.4067	5.85	25.6519	16.7751	43.7933	17.8467	5.69667	18.7338	17.7031	44.1233	19.2467	7.4	20.6202	21.0309	45.33	9.99	10.6233	14.5827	46.7598
	4	42.38	17.9133	5.94667	25.6543	18.3646	47.64	19.3967	7.80333	20.9075	21.9151	46.1833	18.5567	8.14333	20.2648	23.6936	49	11.9167	12.36	17.1691	46.0462
	4	42.04	19.1	5.62	25.1722	16.396	43.4067	19.04	6.58667	20.1471	19.0825	43.6033	18.21	7.53667	19.708	22.4834	44.78	17.87	10.3833	20.6676	30.1587
	4	37.96	20.5033	4.61	24.1031	12.6717	40.9767	20.05	5.31	20.7412	14.8335	40.8033	19.36	6.38667	20.3862	18.2572	41.53	13.18	9.40333	16.1906	35.5061
	4	36.7733	20.4867	5.23667	25.0059	14.3385	42.5567	17.6833	5.81333	18.6144	18.1981	41.3633	19.71	7.83667	21.2108	21.6827	43.16	9.89667	11.87	15.4545	50.1802
	4	42.6633	20.1933	5.41	25.1537	14.9979	42.8767	20.2	9.95667	22.5206	26.2389	42.8233	18.2667	7.23	19.6455	21.5938	46.4333	15.4367	9.12333	17.9311	30.5838
	4	39.0833	19.81	4.59667	23.7296	13.0636	42.6833	19.6933	6.11	20.6194	17.2369	44.63	20.13	8.27333	21.7638	22.3424	42.51	17.74	8.73667	19.7747	26.2195
	4	48.47	20.7	6.27667	26.7027	16.8684	48.8267	20.0233	6.78	21.1401	18.7064	46.58	19.6633	6.58	20.7351	18.5019	47.9067	17.6967	8.86	19.7907	26.5953
	4	39.0167	17.23	4.12	21.8568	13.4479	42.36	13.5433	10.39	17.0697	37.4942	43.4067	18.8367	12.2633	22.4769	33.0655	43.65	10.1033	10.4533	14.5379	45.9754
	4	49.1433	20.2067	12.9633	38.424	32.6817	47.5367	18.0767	6.12	19.0846	18.7039	46.1133	18.6133	7.11667	19.9274	20.924	49.9167	10.3733	12.6933	16.3929	50.7434
	L* =lightness, a*= redness, b*= yellowness, H*= hue angle, and C*= chroma.

## Sheet: Shear force 
								Shear force		(kgF/cm2)
	T= treatment		R=repetition		M= measurement on sample 1 and 2 of the same repetition					Day= day on shelf life
			Day 1				Day 4						Day 7				Day 14
T1	M-1	M-2	Mean		M-1	M-2	Mean		M-1	M-2	M-3	M-4	Mean		M-1	M-2	Mean
R1	2.92	3.48	3.2		1.6	1.4	1.5		3.52	4.16	3.84	3.72	3.81		1.08	1.08	1.08
R2	3.96	2.72	3.34		1.7	1.6	1.65		3.16	2.36	2.1	1.8	2.355		1.22	1.06	1.14
R3	3.32	2.2	2.76		2.38	2.72	2.55		4.06	2.82	3.1	3.42	3.35		1.66	1.8	1.73
R4	1.92	1.88	1.9		1.96	1.86	1.91		2.26	2.24	1.86	2.1	2.115		1.02	1.4	1.21
R5	2.54	1.66	2.1		1.32	1.94	1.63		3.8	3.24	2.24	2.68	2.99		2.12	1.98	2.05
R7	2.78	2.94	2.86		3.06	2.42	2.74		3.12	3.22	2.48	1.74	2.64		0.94	1.42	1.18
R8	2.12	1.96	2.04		1.84	2.48	2.16		4.42	3.74	3.86	3.06	3.77		0.52	0.7	0.61
R9	1.58	4.14	2.86		2.98	3.36	3.17		3.34	2.88			3.11		0.62	0.6	0.61
R10	4.42	4.6	4.51		3.06	2.42	2.74		5.24	5.62	4.44	3.96	4.815		1.94	1.54	1.74
			2.84111				2.22778						3.21722				1.26111
T2
R1	1.56	1.94	1.75		1.2	1.2	1.2		2.06	2.02	2.66	2.54	2.32		0.82	1.04	0.93
R2	3.22	2.3	2.76		2.78	3.12	2.95		3.4	2.58	3.1	2.84	2.98		0.78	1.16	0.97
R3	1.56	1.16	1.36		1.5	1.4	1.45		3.7	2.7	2.58	2.36	2.835		1.04	1.28	1.16
R4	2.28	2.24	2.26		1.86	2.24	2.05		1.5	2.6	3.86	2.48	2.61		1.74	1.36	1.55
R5	2.12	2.46	2.29		2.78	2.18	2.48		2.64	1.88	2.62	2.24	2.345		0.96	0.96	0.96
R6	1.06	1.5	1.28		2.78	2.18	2.48		3.16	2.04	3.34	2.66	2.8		1.16	1.18	1.17
R7	1.22	1.5	1.36		1.54	2.02	1.78		2.7	3.72	2.56	4.18	3.29		1.52	1.08	1.3
R8	2.88	3.02	2.95		3.3	3.02	3.16		2.82	4.32	2.58	3.12	3.21		1.74	2.1	1.92
R9	2.52	2.46	2.49		2.4	2.72	2.56		2.74	2.96	2.52	3.52	2.935		1.36	1.2	1.28
R10	2.74	3.18	2.96		3.66	4.46	4.06		2.8	5.08	3.42	2.66	3.49		1.66	1.12	1.39
			2.146				2.417						2.8815				1.263
T3
R1	1.7	2.02	1.86		1.36	1.02	1.19		2.1	2.1	1.28	1.14	1.655		1.04	0.94	0.99
R2	0.9	1.12	1.01		1.14	1.98	1.56		1.78	0.94	2.06	3.04	1.955		0.64	0.78	0.71
R3	1.82	2.62	2.22		2.38	1.64	2.01		2.56	1.88	1.46	1.98	1.97		2.72	2.42	2.57
R4	1.28	2	1.64		2.12	2.4	2.26		2.56	2.9	1.5	1.64	2.15		1.32	1.2	1.26
R5	2.1	1.96	2.03		2.4	3.18	2.79		2.8	3	3.3	2.48	2.895		1.08	0.8	0.94
R6	2.16	3.54	2.85		2.78	3.2	2.99		4.22	4.16	4.01	4.02	4.1025		2.14	3.1	2.62
R7	1.52	1.5	1.51		2.46	3.06	2.76		1.76	1.98	1.56	1.82	1.78		1	0.8	0.9
R8	2.6	2.1	2.35		3.3	3	3.15		2	2.24	1.78	1.56	1.895		1.66	1.56	1.61
R9	4.08	3.78	3.93		2.36	4.3	3.33		3.38	3.3	3.48	3.04	3.3		2.22	3.1	2.66
R10	3.42	2.64	3.03		1.66	1.3	1.48		2.5	2.6	1.88	2.16	2.285		1.14	1.16	1.15
			2.243				2.352						2.39875				1.541
T4
R1	2.04	1.5	1.77		2.12	2.12	2.12		4.12	3.34	2.44	2.42	3.08		1.84	1.76	1.8
R2	1.72	1.54	1.63		1.32	1.2	1.26		2.74	2.5	1.62	1.66	2.13		1.12	1.22	1.17
R3	1.08	1.28	1.18		2	1.78	1.89		2.58	2.94	2.48	2.86	2.715		1.26	1.14	1.2
R4	3.34	3.6	3.47		3.5	2.76	3.13		1.08	1.18	1.9	2.52	1.67		1.44	1.2	1.32
R5	2.52	2.7	2.61		3.36	1.9	2.63		2.38	3.02	2.9	2.18	2.62		1.9	1.86	1.88
R6	2.28	2.74	2.51		2.22	1.62	1.92		1.72	1.76	1.8	1.78	1.765		0.94	0.9	0.92
R7	1.78	2.26	2.02		1.78	2.2	1.99		2.92	3.24	2.28	2.2	2.66		1.56	1.68	1.62
R8	1.12	1.78	1.45		1.5	1.22	1.36		1.88	2.06	1.34	1.7	1.745		1.06	1.02	1.04
R9	6.54	3.84	5.19		6.34	4.06	5.2		3.38	4.36	3.26	3.3	3.575		1.3	1.6	1.45
R10	2.06	1.9	1.98		1.92	1.76	1.84		2.08	1.84	1.84	1.74	1.875		1	1.28	1.14
			2.381				2.334						2.3835				1.354

## Sheet: Lipid oxidation
Lipid Oxidatio
Treatment	Repetition	Period	Malondialdehyde (mg)
1	1	1	0.176
1	2	1	0.122
2	1	1	0.083
2	2	1	0.129
3	1	1	0.518
3	2	1	0.603
4	1	1	0.653
4	2	1	0.425
1	1	2	0.091
1	2	2	0.234
2	1	2	0.129
2	2	2	0.106
3	1	2	0.638
3	2	2	0.944
4	1	2	0.7
4	2	2	0.455
1	1	3	0.35
1	2	3	0.625
2	1	3	0.517
2	2	3	0.394
3	1	3	1.231
3	2	3	1.692
4	1	3	1.964
4	2	3	0.943

## Sheet: Phenols 
			Total	phenols	(mg/g MS)
		Feed
			R1	R2	R3	R4		T= treatment
		T1	2.81	2	2.75	2.9
		T2	4.72	4.71	4	4.74		R= repetition
		T3	6.73	6	6.5	6.88
		T4	8	7.5	7.79	7
		Faeces
			R1	R2	R3	R4
		T1	1.17	1.1	1.5	1.2
		T2	0.86	0.9	0.94	0.95
		T3	1.05	1	1.1	0.93
		T4	1.15	1.09	1.2	1.12
		Bioaccessibility (%)
			R1	R2	R3	R4
		T1	58.4	45	45.5	58.6
		T2	81.8	80.9	76.5	80
		T3	84.4	83.3	83.1	86.5
		T4	85.6	85.5	84.6	84

## Sheet: Fatty acids 
				Fatty acid composition (% of total methylated fatty acid esters) in meat									T= treatment
	Myristic (c14-0)	Pentadecanoic (c15-0)	Palmitic (c16-0)	Heptadecanoic (c17-0)	Stearic (c18-0)	Palmitoleic (c16-1)	cis-10-heptadecanoic (c17-1)	Helladic (c18-1n-9t)	Oleic (c18-1)	Linoleic (c18-2)	Cis-11-eicosenoic (c20-1 n9)	Linolenic (c18-3)	Cis-9, trans11 CLA	CLA 12	Araquidonic (c20-4)
T1	2.1362	0.1065	25.4118	1.0473	16.7007	2.0844	0.4142	3.354	39.2974	6.0373	0.0587	0.1033	0.0831	0	1.7687
T1	2.1934	0.9145	22.3765	1.0533	14.1968	2.6283	0.8394	2.9821	44.2025	4.5592	0.0659	0.051	0.138	0	1.7316
T1	3.0663	0.3246	28.9295	1.4025	15.1597	2.4218	0.6149	3.9861	38.7021	3.4765	0.0473	0.0605	0.0777	0	0.6371
T1	1.8178	0.3012	19.8734	1.4945	17.0667	2.1418	0.895	3.4498	41.2253	7.2961	0.0728	0.083	0.145	0	2.041
T1	2.9345	0.3118	26.3154	1.438	15.8239	2.4683	0.831	3.8215	39.9516	3.32812	0.0516	0.0589	0.0732	0	1.136
T1	2.2708	0.3065	24.0416	1.5623	15.4063	2.5683	0.8568	2.7663	42.5706	4.1976	0.0508	0.0586	0.0884	0	1.4364
T1	2.9309	0.4392	26.0949	1.7162	13.6931	2.5036	0.8539	3.9669	39.3151	5.0211	0.0412	0.1417	0.098	0	1.3675
T1	1.7756	0.1309	22.4225	1.1624	16.0764	2.1102	0.719	1.8365	45.7807	4.4594	0.0591	0.0464	0.0659	0	1.6586
T1	2.715	0.2629	25.4191	1.1684	15.845	1.8527	0.4945	2.1216	42.5921	4.4744	0.0441	0.1072	0.1463	0	1.4054
T2	2.5842	0.399	26.2033	1.4466	16.9016	2.1202	0.6115	1.6912	42.1389	3.519	0.049	0.0579	0.0839	0	0.8212
T2	1.99	0.2851	24.214	1.4739	17.3862	2.1661	0.728	2.5964	43.3636	2.8846	0.0642	0.0624	0.1409	0	1.0323
T2	2.0671	0.2547	23.0123	1.0478	13.2727	2.2482	0.7696	1.5362	46.1565	6.5323	0.0426	0.0904	0.1018	0	1.8548
T2	1.7446	0.3087	21.9307	1.9029	17.865	2.0357	1.0645	4.4301	38.9414	6.0518	0.0597	0.0703	0.0472	0	1.5449
T2	2.9758	0.231	27.7214	1.1348	16.2842	2.4556	0.6317	3.925	36.8198	5.3384	0.0549	0.0631	0.0681	0	0.9275
T2	1.8084	0.2267	21.0473	1.497	17.4126	2.1876	0.7079	2.2578	42.5253	5.7262	0.0533	0.1024	0.0916	0	2.3195
T2	3.0998	0.3877	27.2378	1.4159	13.9425	2.3508	0.8873	2.5355	42.343	3.4349	0.0335	0.0882	0.084	0	0.7902
T2	2.5397	0.7494	25.8952	2.4716	11.933	2.9876	1.6137	8.851	34.635	5.4492	0.0511	0.0899	0.0963	0	1.1755
T2	2.5013	0.3579	24.644	1.6533	16.4922	2.1445	0.9369	3.1067	40.5442	4.3418	0.0575	0.054	0.1503	0	1.235
T3	2.2146	0.4985	24.3909	2.1499	15.1459	1.9759	1.2472	4.5166	41.3166	4.2114	0.0535	0.089	0.1195	0	0.5704
T3	2.215	0.1687	24.5963	0.9193	16.7664	2.0864	0.4466	4.4428	41.5581	4.5284	0.1537	0.1312	0.2269	0	1.1451
T3	2.0262	0.3117	22.8642	1.5663	14.6668	2.2327	1.0348	2.5667	46.9071	3.173	0.0523	0.0458	0.1377	0	0.8325
T3	2.7871	0.4013	23.7487	1.7296	14.4819	2.2869	1.1218	2.0548	41.1566	6.2764	0.033	0.1446	0.1321	0	1.7812
T3	2.7775	0.3814	26.4416	1.5777	12.6377	2.5436	1.023	8.073	35.2323	5.7977	0.0545	0.1082	0.1356	0	1.2847
T3	2.3606	0.2901	24.4694	1.4422	17.3858	1.8818	0.7794	2.9938	41.2534	4.3176	0.056	0.0803	0.1025	0	1.1161
T3	2.8844	0.2638	27.7347	1.2953	13.9943	2.3695	0.7673	5.8822	37.2389	4.8864	0.0537	0.0683	0.1112	0	0.9216
T3	2.6418	0.3516	24.1861	1.5016	13.1703	2.5603	1.0991	2.6796	45.1926	3.9183	0.0423	0.1218	0.1898	0	0.7507
T3	2.4678	0.338	24.9619	1.5424	14.9776	2.4075	0.9834	2.0747	42.6847	4.4121	0.0397	0.0669	0.0968	0	1.2792
T4	2.2484	0.2778	23.7735	1.5085	13.0852	2.1843	1.1552	3.7073	41.6227	6.7462	0.0613	0.1007	0.1286	0	1.498
T4	3.1666	0.5236	27.967	1.5201	13.8742	2.328	0.8641	5.7352	36.7184	4.5775	0.0561	0.1085	0.1029	0	1.0018
T4	1.6682	0.2698	22.3276	1.6432	13.444	1.9317	0.9174	3.1455	43.9563	6.7143	0.0514	0.0744	0.0756	0.0307	2.0063
T4	3.5066	0.4494	25.417	1.6765	13.7899	2.5297	0.9096	2.3935	40.2197	6.3043	0.0506	0.0518	0.1337	0.0079	0.9374
T4	2.7665	0.4058	27.495	1.4266	13.3453	2.123	0.7845	2.9216	41.6807	5.1171	0.0278	0.1857	0.1303	0.0162	0.4846
T4	2.031	0.3258	24.396	1.5857	14.8886	1.7685	0.6322	2.7142	42.0299	6.2869	0.0646	0.0551	0.1972	0.0177	1.0808
T4	1.6962	0.1829	21.607	1.1206	14.2156	2.0672	0.6306	2.4529	43.8975	6.7822	0.0729	0.0608	0.1048	0.0323	2.4298
T4	2.6778	0.4263	25.3923	1.8182	13.1679	2.2952	1.0236	8.2775	34.7746	6.5726	0.0664	0.094	0.1049	0.0227	1.2574
T4	3.1697	0.7304	27.6305	1.5647	12.0577	3.0434	0.6614	2.3554	41.6806	5.1393	0.0422	0.1357	0.1719	0.0178	0.9033

## Sheet: Phenols in meat
					Phenols in meat mg g-1 MS
Treatment	Phenols in meat				Trat 1	Trat 2	Trat 3	Trat 4
1	0.109				0.109	0.479	0.479	0.538		Trat= treatment
1	0.108				0.108	0.423	0.482	0.557
1	0.109				0.109	0.44	0.469	0.548
1	0.107				0.107	0.487	0.496	0.543
1	0.112				0.112	0.47	0.472	0.547
1	0.101				0.101	0.498	0.469	0.579
1	0.1				0.1	0.482	0.456	0.532
1	0.119				0.119	0.49	0.497	0.53
1	0.118				0.118	0.479	0.482	0.531
2	0.479
2	0.423
2	0.44
2	0.487
2	0.47
2	0.498
2	0.482
2	0.49
2	0.479
3	0.479
3	0.482
3	0.469
3	0.496
3	0.472
3	0.469
3	0.456
3	0.497
3	0.482
4	0.538
4	0.557
4	0.548
4	0.543
4	0.547
4	0.579
4	0.532
4	0.53
4	0.531
